# Supplementary material
Source: HighWire-hosted journal article supplement (https://bmjopen.bmj.com/content/15/5/e092544)
Supplement: inline-supplementary-material-1 [file inline-supplementary-material-1.pdf]

Appendix 1. Semi-structured interview questions

| Category                                                 | Detailed questions                                                                                                                                                                                                                                                                                                                                                                                                                                                                                                                                                                                                               |
|----------------------------------------------------------|----------------------------------------------------------------------------------------------------------------------------------------------------------------------------------------------------------------------------------------------------------------------------------------------------------------------------------------------------------------------------------------------------------------------------------------------------------------------------------------------------------------------------------------------------------------------------------------------------------------------------------|
| Greetings and introduction                               | Greetings and introduction<br>Explanation of the purpose of the study and obtaining written consent forms                                                                                                                                                                                                                                                                                                                                                                                                                                                                                                                        |
| Section 1 (Demographic characteristics)                  |                                                                                                                                                                                                                                                                                                                                                                                                                                                                                                                                                                                                                                  |
| Initiating questions                                     | How old are you? What was your first pregnancy age?<br>Which pregnancy was your loss?<br>Did you have a living child when you experienced the loss?                                                                                                                                                                                                                                                                                                                                                                                                                                                                              |
| Section 2 (Questions regarding the purpose of the study) |                                                                                                                                                                                                                                                                                                                                                                                                                                                                                                                                                                                                                                  |
| Transition questions                                     | Did you want the pregnancy you lost?<br>Did you get help/support from your partner when you needed it during this event?<br>In which week did your pregnancy end?<br>Did you learn the gender of your baby?                                                                                                                                                                                                                                                                                                                                                                                                                      |
| Core questions                                           | What do you think caused this loss? What led you to this thought? Why do you think these reasons caused the loss?<br>How did you feel after the loss? If you were to compare this feeling to a feeling you know, what would it be? Did you have a hard time accepting this loss?<br>Did your feelings after the loss reflect on your work, family, or social environment? Does this situation still affect your life?<br>Is there anything you can't forget about this loss?<br>What has changed in your daily life in the short and long term after the loss?<br>What did you do to cope with negative emotions after the loss? |
| Closing questions                                        | Is there anything else you would like to mention about this loss?<br>Interview ends                                                                                                                                                                                                                                                                                                                                                                                                                                                                                                                                              |
